# Supplementary material for: Influenza Vaccination Coverage among Registered Nurses in China during 2017–2018: An Internet Panel Survey
Source: PubMed Central journal article supplement (PMC6963313; doi:10.3390/vaccines7040134), 2019-09-29
Supplement: vaccines-07-00134-s001.pdf [file vaccines-07-00134-s001.pdf]

# Nurse Flu Survey Questionnaire, China, 2017–2018 Season

(Translated from original questionnaire in Chinese)

## Part I. Basic Information

(1) Sex:

- Male  Female

(2) Age:

- 18–24 years     25–29 years  
 30–34 years     35 years and above

(3) Where do you live now?

- Beijing  Heilongjiang  Shaanxi  Guangdong  Yunnan  Jiangsu  
 Other (End survey)

(4) How many years have you been working as a nurse in a healthcare institution?

- 0–2 years     3–5 years     6 years and above

(5) Where do you currently work?

- Hospital/clinic  
 Emergency service center (Jump to Question 8)  
 Long-term care facility (Jump to Question 8)  
 Blood bank (Jump to Question 8)  
 Other, including public health setting, healthcare education institute, and pharmacy etc. (Jump to Question 8)

(6) If you work in a hospital, what is the level of the hospital?

- Tertiary     Secondary     Primary     Unclassified

(7) If you work in a hospital, what department do you work in?

- Outpatient clinic     Fever clinic     Emergency department     Surgery  
 Internal medicine (not including the respiratory department)  
 Respiratory department     Pediatrics  
 Intensive care unit (ICU, CCU, EICU, PICU, NICU, and NSICU etc.)  
 Infectious diseases department     Immunization clinic  
 Non-clinical departments (including disinfection supply division, medical record room, and laboratory branch etc.)  
 Other

## Part II. Self-reported Influenza Like Illness (during the period of 1 October, 2017 to 20 March, 2018)

(8) From 1 October, 2017 to 20 March, 2018, did you have influenza-like illness symptoms (fever with sore throat or cough)?

- Yes     No (Jump to Question 12)     Don't remember (Jump to Question 12)

If yes, I experienced \_\_\_\_\_ episodes of influenza-like illness during this period; among which,

\_\_\_\_\_ episodes of influenza-like illness with body temperature  $\geq$  38 ° C;

\_\_\_\_\_ episodes of influenza-like illness with body temperature < 38 ° C;

\_\_\_\_\_ episodes of influenza-like illness with body temperature unknown.

(9) During the period of 1 October, 2017 and 20 March, 2018, did you see a doctor for the last episode of your influenza-like illness?

Yes  No (Jump to Question 10)  Don't remember (Jump to Question 10)

If yes, did your doctor order a test for influenza virus?

Yes  No (Jump to Question 10)  Don't remember (Jump to Question 10)

If yes, what was the test result?

Positive  Negative

(10) During the period from 1 October, 2017 to 20 March, 2018, did you take sick leave for the last episode of your influenza-like illness?

Yes, I took sick leave for \_\_\_\_\_ days.  No  Don't remember

(11) During the period from 1 October, 2017 to 20 March, 2018, when you had your last episode of influenza-like illness, did you work while sick?

Yes  No  Don't remember

(12) Do you think there is a difference between influenza and the common cold?

Yes  No  Don't know

(13) Do you think the influenza virus can lead to severe consequences (hospitalization, severe complications and death)?

Yes  No  Don't know

(14) If you have influenza-like illness symptoms (fever with sore throat or cough), will you take the following protections?

Frequent hand washing:  Yes  No  Don't know

Wearing mask:  Yes  No  Don't know

Self-segregation (by avoiding crowded places and close contact with people):

Yes  No  Don't know

(15) Is the department where you work equipped with a hand sanitizer?

Yes  No

### **Part III. Self-reported Influenza Vaccination** (during the year prior to this survey)

(16) During the year before this survey (i.e. between March, 2017 and March, 2018), were you vaccinated for influenza?

Yes  No (Jump to Question 18)  Don't remember (Jump to Question 18)

If yes, how was the fee for the influenza vaccine covered?

at my own expense  provided free by my employer  other

(17) What are the main reasons you were vaccinated for influenza? (*select all that apply*)

To protect myself

To protect patients or persons I care for

To protect my family

To avoid the impact illness could have on my capacity to work

Vaccination was required by my employer

Free vaccination was offered on-site

other \_\_\_\_\_

(18) What are the main reasons you were not vaccinated for influenza? (*select all that apply*):

I don't know the vaccine

- I don't know the effect of this vaccine
- I am worried about the side effects
- I am too busy to get vaccinated
- Influenza is not serious
- I believe I am healthy and do not need to get vaccinated
- I don't know where and when I can get vaccinated
- The procedures of vaccination are too cumbersome
- Vaccination fees cannot be reimbursed
- other\_\_\_\_\_

(19)For this year's flu season, are you willing to get vaccinated for influenza?

- Yes  No

**Part IV. Recommendation of Influenza Vaccine**

(20)Have you ever recommended the influenza vaccine to your patients or persons you have cared for?

- Yes (Jump to Question 22)  No

(21)If not, what are the main reasons for not recommending the influenza vaccine? (*select all that apply*)

- I don't know the vaccine
- I don't know the effect of this vaccine
- I am worried about the side effects and the subsequent lawsuit raised by patients
- Influenza is not serious and does not require vaccination
- other\_\_\_\_\_

(22)For this year's flu season, for which of the following groups are you willing to recommend influenza vaccine? (*select all that apply*)

- Children
- Older adults aged  $\geq 65$  years
- Pregnant women
- Patients with underlying chronic medical conditions
- Patients who are immunocompromised
- Adolescents or young adults
- Family members or friends

**Note:**

1. Only subjects who obtained a nursing license since January, 2017 will be surveyed.
